# Supplementary material for: Health-related quality of life of children with first onset steroid-sensitive nephrotic syndrome
Source: PubMed Central journal article supplement (PMC10587200; doi:10.1007/s00431-023-05135-5), 2023-08-07
Supplement: 431_2023_5135_MOESM1_ESM.pdf [file 431_2023_5135_MOESM1_ESM.pdf]

## Online Resource 1

to:

### **Health-related quality of life and emotional behavioral difficulties in children with first onset steroid-sensitive nephrotic syndrome**

Floor Veltkamp<sup>1,2</sup>, MD, Lorynn Teela<sup>2,3</sup>, MSc, Michiel A.J. Luijten<sup>2,3</sup>, MSc, Hedy A. van Oers<sup>2,3,4</sup>, PhD, Elske M. Mak-Nienhuis<sup>1</sup>, Lotte Haverman<sup>2,3,4</sup>†, PhD, and Antonia H.M. Bouts<sup>1,2</sup>‡, MD PhD, on behalf of the LEARNS consortium‡.

† *Contributed equally as co-senior authors.*

‡ *A complete list of study group members appears in the Acknowledgments.*

<sup>1</sup> Amsterdam University Medical Centers location University of Amsterdam, Emma Children's Hospital, Department of Pediatric Nephrology, Meibergdreef 9, Amsterdam, the Netherlands.

<sup>2</sup> Amsterdam Reproduction and Development, Child development, Amsterdam, The Netherlands.

<sup>3</sup> Amsterdam UMC location University of Amsterdam, Emma Children's Hospital, Child and Adolescent Psychiatry & Psychosocial Care, Meibergdreef 9, Amsterdam, The Netherlands.

<sup>4</sup> Amsterdam Public Health, Mental health, Amsterdam, the Netherlands.

**Corresponding author:** Antonia H.M. Bouts, MD PhD, Amsterdam University Medical Centers, University of Amsterdam, Emma Children's Hospital, Department of Pediatric Nephrology, Post box 22660, 1100 DD, Amsterdam, the Netherlands.

a.h.bouts@amsterdamumc.nl

**Table S1** Item scores of the PedsQL questionnaire per age category, shown as proportions (%)

|                                       |                | <b>a. PedsQL 2-4 years</b> |       |                |                 |       |
|---------------------------------------|----------------|----------------------------|-------|----------------|-----------------|-------|
|                                       |                | Almost<br>always           | Often | Some-<br>times | Almost<br>never | Never |
| <b>Physical functioning</b>           |                |                            |       |                |                 |       |
| Hard to walk more than one block      | LEARNS (n=16)  | 0                          | 0     | 13             | 6               | 81    |
|                                       | Norm (n= 293)  | 1.4                        | 0     | 2.4            | 3.4             | 93    |
| Hard to run                           | LEARNS (n=16)  | 0                          | 6     | 13             | 6               | 75    |
|                                       | Norm (n= 293)  | 1.7                        | 0.3   | 2.4            | 6.1             | 89    |
| Hard to do sports or exercises        | LEARNS (n=16)  | 0                          | 13    | 6              | 13              | 69    |
|                                       | Norm (n= 293)  | 1.4                        | 0.7   | 2              | 5.1             | 91    |
| Hard to lift something heavy          | LEARNS (n=16)  | 0                          | 0     | 6              | 13              | 81    |
|                                       | Norm (n= 293)  | 0.7                        | 0.3   | 4.8            | 9.2             | 85    |
| Hard to take a bath or shower         | LEARNS (n=16)  | 0                          | 6     | 0              | 13              | 81    |
|                                       | Norm (n= 293)  | 1                          | 1.4   | 3.1            | 5.5             | 89    |
| Hard to do chores / clean up toys     | LEARNS (n=16)  | 0                          | 6     | 6              | 19              | 69    |
|                                       | Norm (n= 293)  | 0.7                        | 3.4   | 18             | 20              | 57    |
| Hurt or ache                          | LEARNS (n=16)  | 0                          | 0     | 50             | 19              | 31    |
|                                       | Norm (n= 293)  | 0                          | 1.4   | 13             | 26              | 60    |
| Low energy                            | LEARNS (n=16)  | 0                          | 19    | 38             | 19              | 25    |
|                                       | Norm (n= 293)  | 0.3                        | 0.7   | 9.9            | 20              | 69    |
| <b>Emotional functioning</b>          |                |                            |       |                |                 |       |
| Feel afraid or scared                 | LEARNS (n=16)  | 0                          | 6     | 31             | 6               | 56    |
|                                       | Norm (n= 293)  | 0                          | 1.7   | 24             | 37              | 37    |
| Feel sad or blue                      | LEARNS (n=16)  | 0                          | 0     | 50             | 19              | 31    |
|                                       | Norm (n= 293)  | 0                          | 0.3   | 15             | 38              | 46    |
| Feel angry                            | LEARNS (n=16)  | 0                          | 0     | 50             | 38              | 13    |
|                                       | Norm (n= 293)  | 0                          | 4.4   | 42             | 33              | 20    |
| Trouble sleeping                      | LEARNS (n=16)  | 0                          | 6     | 6              | 31              | 56    |
|                                       | Norm (n= 293)  | 0.7                        | 4.4   | 18             | 32              | 45    |
| Worry about what will happen          | LEARNS (n=16)  | 6                          | 0     | 19             | 13              | 63    |
|                                       | Norm (n= 293)  | 0                          | 1.7   | 9.2            | 34              | 55    |
| <b>Social functioning</b>             |                |                            |       |                |                 |       |
| Trouble getting along with peers      | LEARNS (n=16)  | 6                          | 6     | 19             | 13              | 56    |
|                                       | Norm (n= 293)  | 1                          | 2.7   | 8.9            | 28              | 59    |
| Other kids not wanting to be friends  | LEARNS (n=16)  | 0                          | 0     | 0              | 19              | 81    |
|                                       | Norm (n= 293)  | 0.7                        | 0.3   | 4.1            | 17              | 78    |
| Teased                                | LEARNS (n=16)  | 0                          | 0     | 0              | 13              | 88    |
|                                       | Norm (n= 293)  | 0                          | 0     | 2.7            | 14              | 83    |
| Doing things other peers do           | LEARNS (n=16)  | 0                          | 6     | 19             | 19              | 56    |
|                                       | Norm (n= 293)  | 1.4                        | 2     | 7.2            | 20              | 69    |
| Hard to keep up when play with others | LEARNS (n=16)  | 0                          | 6     | 13             | 19              | 63    |
|                                       | Norm (n= 293)  | 2.7                        | 3.1   | 4.8            | 16              | 73    |
| <b>School functioning</b>             |                |                            |       |                |                 |       |
| Trouble keeping up with activities    | LEARNS (n=16)  | 0                          | 0     | 13             | 13              | 75    |
|                                       | Norm* (n= 293) | 3.3                        | 1.6   | 4.1            | 11              | 80    |
| Miss school – not well                | LEARNS (n=16)  | 0                          | 13    | 6              | 25              | 56    |
|                                       | Norm* (n= 293) | 0.4                        | 0.4   | 3.3            | 13              | 83    |
| Miss school – doctor appointment      | LEARNS (n=16)  | 0                          | 0     | 25             | 19              | 56    |
|                                       | Norm* (n= 293) | 0                          | 0.8   | 2.5            | 9.1             | 88    |

\*Data missing for 50 respondents.

**b. PedsQL 5-7 years**

|                                       |               | Almost<br>always | Often | Some-<br>times | Almost<br>never | Never |
|---------------------------------------|---------------|------------------|-------|----------------|-----------------|-------|
| <b>Physical functioning</b>           |               |                  |       |                |                 |       |
| Hard to walk more than one block      | LEARNS (n=13) | 0                | 0     | 0              | 0               | 100   |
|                                       | Norm (n= 274) | 1.1              | 0     | 1.8            | 2.9             | 94    |
| Hard to run                           | LEARNS (n=13) | 0                | 0     | 0              | 23              | 77    |
|                                       | Norm (n= 274) | 1.5              | 2.2   | 2.6            | 2.9             | 91    |
| Hard to do sports or exercises        | LEARNS (n=13) | 0                | 0     | 31             | 8               | 62    |
|                                       | Norm (n= 274) | 1.1              | 1.5   | 4.7            | 4.4             | 88    |
| Hard to lift something heavy          | LEARNS (n=13) | 0                | 0     | 8              | 15              | 77    |
|                                       | Norm (n= 274) | 0.4              | 0.7   | 2.9            | 4.7             | 91    |
| Hard to take a bath or shower         | LEARNS (n=13) | 0                | 0     | 0              | 8               | 92    |
|                                       | Norm (n= 274) | 2.9              | 4.7   | 4.4            | 7.7             | 80    |
| Hard to do chores around the house    | LEARNS (n=13) | 0                | 0     | 0              | 15              | 85    |
|                                       | Norm (n= 274) | 1.1              | 5.1   | 11             | 17              | 66    |
| Hurt or ache                          | LEARNS (n=13) | 0                | 0     | 38             | 23              | 38    |
|                                       | Norm (n= 274) | 0.4              | 1.5   | 15             | 34              | 49    |
| Low energy                            | LEARNS (n=13) | 0                | 8     | 38             | 23              | 31    |
|                                       | Norm (n= 274) | 0                | 1.8   | 11             | 19              | 68    |
| <b>Emotional functioning</b>          |               |                  |       |                |                 |       |
| Feel afraid or scared                 | LEARNS (n=13) | 0                | 0     | 15             | 38              | 46    |
|                                       | Norm (n= 274) | 0                | 4.7   | 23             | 34              | 38    |
| Feel sad or blue                      | LEARNS (n=13) | 0                | 8     | 38             | 23              | 31    |
|                                       | Norm (n= 274) | 0                | 2.6   | 19             | 39              | 40    |
| Feel angry                            | LEARNS (n=13) | 0                | 31    | 38             | 15              | 15    |
|                                       | Norm (n= 274) | 0                | 8.4   | 41             | 33              | 18    |
| Trouble sleeping                      | LEARNS (n=13) | 0                | 8     | 31             | 23              | 38    |
|                                       | Norm (n= 274) | 1.5              | 4.4   | 15             | 26              | 53    |
| Worry about what will happen          | LEARNS (n=13) | 0                | 0     | 15             | 23              | 62    |
|                                       | Norm (n= 274) | 0.4              | 2.6   | 9.1            | 20              | 68    |
| <b>Social functioning</b>             |               |                  |       |                |                 |       |
| Trouble getting along with peers      | LEARNS (n=13) | 0                | 0     | 8              | 31              | 62    |
|                                       | Norm (n= 274) | 5.1              | 3.3   | 9.5            | 25              | 57    |
| Other kids not wanting to be friends  | LEARNS (n=13) | 0                | 0     | 0              | 0               | 100   |
|                                       | Norm (n= 274) | 0.4              | 2.9   | 7.3            | 26              | 64    |
| Teased                                | LEARNS (n=13) | 0                | 0     | 0              | 0               | 100   |
|                                       | Norm (n= 274) | 0                | 0.7   | 8.4            | 28              | 63    |
| Doing thing other peers do            | LEARNS (n=13) | 0                | 0     | 0              | 8               | 92    |
|                                       | Norm (n= 274) | 0.7              | 2.2   | 8              | 22              | 68    |
| Hard to keep up when play with others | LEARNS (n=13) | 0                | 0     | 8              | 15              | 77    |
|                                       | Norm (n= 274) | 2.6              | 4     | 5.1            | 22              | 67    |
| <b>School functioning</b>             |               |                  |       |                |                 |       |
| Focus                                 | LEARNS (n=13) | 0                | 0     | 8              | 15              | 77    |
|                                       | Norm (n= 274) | 2.2              | 7.3   | 21             | 22              | 48    |
| Forgetting things                     | LEARNS (n=13) | 0                | 0     | 0              | 31              | 69    |
|                                       | Norm (n= 274) | 0                | 5.8   | 13             | 24              | 57    |
| Trouble keeping up with schoolwork    | LEARNS (n=13) | 0                | 0     | 0              | 23              | 77    |
|                                       | Norm (n= 274) | 2.6              | 4.4   | 11             | 19              | 63    |
| Miss school – not well                | LEARNS (n=13) | 0                | 8     | 0              | 15              | 77    |
|                                       | Norm (n= 274) | 0                | 0.7   | 5.5            | 15              | 79    |
| Miss school – doctor appointment      | LEARNS (n=13) | 0                | 0     | 31             | 23              | 46    |
|                                       | Norm (n= 274) | 0                | 1.1   | 3.6            | 19              | 76    |

c. PedsQL 8-17 years

|                                       |               | Almost<br>always | Often | Some-<br>times | Almost<br>never | Never |
|---------------------------------------|---------------|------------------|-------|----------------|-----------------|-------|
| <b>Physical functioning</b>           |               |                  |       |                |                 |       |
| Hard to walk more than one block      | LEARNS (n=11) | 0                | 9     | 18             | 9               | 64    |
|                                       | Norm (n=964)  | 0.4              | 0.3   | 2.3            | 6               | 91    |
| Hard to run                           | LEARNS (n=11) | 0                | 9     | 27             | 9               | 55    |
|                                       | Norm (n=964)  | 0.6              | 2.5   | 5.1            | 11.5            | 80    |
| Hard to do sports or exercises        | LEARNS (n=11) | 0                | 18    | 36             | 27              | 18    |
|                                       | Norm (n=964)  | 0.8              | 1.9   | 7              | 11.2            | 19.1  |
| Hard to lift something heavy          | LEARNS (n=11) | 0                | 18    | 27             | 18              | 36    |
|                                       | Norm (n=964)  | 0.7              | 0.9   | 6.8            | 17.4            | 74.1  |
| Hard to take a bath or shower         | LEARNS (n=11) | 0                | 0     | 0              | 9               | 91    |
|                                       | Norm (n=964)  | 0.4              | 1.2   | 0.8            | 2.3             | 95.2  |
| Hard to do chores around the house    | LEARNS (n=11) | 0                | 0     | 27             | 9               | 64    |
|                                       | Norm (n=964)  | 0.6              | 2     | 5.5            | 8.5             | 83.4  |
| Hurt or ache                          | LEARNS (n=11) | 9                | 9     | 27             | 45              | 9     |
|                                       | Norm (n=964)  | 0.9              | 4.1   | 12.3           | 20.7            | 61.8  |
| Low energy                            | LEARNS (n=11) | 9                | 18    | 36             | 18              | 18    |
|                                       | Norm (n=964)  | 1.2              | 2.6   | 10.4           | 21.2            | 64.6  |
| <b>Emotional functioning</b>          |               |                  |       |                |                 |       |
| Feel afraid or scared                 | LEARNS (n=11) | 0                | 0     | 18             | 27              | 55    |
|                                       | Norm (n=964)  | 0.3              | 3.2   | 11.6           | 29.8            | 55.1  |
| Feel sad or blue                      | LEARNS (n=11) | 0                | 0     | 45             | 27              | 27    |
|                                       | Norm (n=964)  | 0.7              | 4.1   | 20.4           | 34.8            | 39.9  |
| Feel angry                            | LEARNS (n=11) | 9                | 18    | 27             | 27              | 18    |
|                                       | Norm (n=964)  | 0.4              | 4.3   | 26.1           | 33.6            | 35.6  |
| Trouble sleeping                      | LEARNS (n=11) | 9                | 9     | 45             | 9               | 27    |
|                                       | Norm (n=964)  | 2.1              | 6.7   | 17             | 27.6            | 46.6  |
| Worry about what will happen          | LEARNS (n=11) | 36               | 9     | 9              | 18              | 27    |
|                                       | Norm (n=964)  | 1.3              | 4.6   | 11.5           | 27.5            | 55.1  |
| <b>Social functioning</b>             |               |                  |       |                |                 |       |
| Trouble getting along with peers      | LEARNS (n=11) | 0                | 0     | 9              | 18              | 73    |
|                                       | Norm (n=964)  | 0.4              | 3.3   | 12.8           | 33.7            | 49.8  |
| Other kids not wanting to be friends  | LEARNS (n=11) | 0                | 0     | 0              | 27              | 73    |
|                                       | Norm (n=964)  | 1.1              | 5.3   | 14.5           | 29.3            | 49.8  |
| Teased                                | LEARNS (n=11) | 0                | 0     | 9              | 0               | 91    |
|                                       | Norm (n=964)  | 0.5              | 1.8   | 11.9           | 22.9            | 62.9  |
| Doing thing other peers do            | LEARNS (n=11) | 0                | 0     | 0              | 55              | 45    |
|                                       | Norm (n=964)  | 1.1              | 3.3   | 14             | 23              | 58.5  |
| Hard to keep up when play with others | LEARNS (n=11) | 0                | 0     | 0              | 55              | 45    |
|                                       | Norm (n=964)  | 0.5              | 2.6   | 7.7            | 18.7            | 70.5  |
| <b>School functioning</b>             |               |                  |       |                |                 |       |
| Focus                                 | LEARNS (n=11) | 0                | 0     | 9              | 45              | 45    |
|                                       | Norm (n=964)  | 2.1              | 6.2   | 27.2           | 27.6            | 36.9  |
| Forgetting things                     | LEARNS (n=11) | 0                | 0     | 27             | 36              | 36    |
|                                       | Norm (n=964)  | 1                | 7.2   | 25.9           | 32.5            | 33.4  |
| Trouble keeping up with schoolwork    | LEARNS (n=11) | 0                | 18    | 0              | 36              | 45    |
|                                       | Norm (n=964)  | 2.2              | 6.4   | 17.4           | 26.3            | 47.6  |
| Miss school – not well                | LEARNS (n=11) | 0                | 9     | 9              | 45              | 36    |
|                                       | Norm (n=964)  | 0.3              | 0.9   | 7.7            | 21.8            | 69.3  |
| Miss school – doctor appointment      | LEARNS (n=11) | 9                | 0     | 36             | 36              | 18    |
|                                       | Norm (n=964)  | 0                | 1.2   | 9              | 21.4            | 68.4  |

**Table S2** Behavioral and emotional difficulties scores of the parent-reported (P) and self-reported versions (C) of the SDQ. Cohen’s *d* indicates the effect size. Effect sizes of 0.2, 0.5, and 0.8 were considered small, moderate, and high, respectively. Higher scores on Prosocial behavior reflect strengths, higher scores on the four negative attributions reflect difficulties. Total difficulties is the sum of negative attribution scales (range 0-40), Internalizing problems the sum of the Emotional symptoms and Conduct problems scales (range 0-20), and Externalizing problems the sum of the Hyperactivity-inattention and Peer problems scales (range 0-20). - = no scores available due to low internal inconsistency ( $\alpha < 0.500$ ); SD = standard deviation; SDQ = Strengths and Difficulties Questionnaire

|                           | <i>SDQ scores</i> |           |                                 |           |                       | <i>Clinical scores</i> |              |              |  |
|---------------------------|-------------------|-----------|---------------------------------|-----------|-----------------------|------------------------|--------------|--------------|--|
|                           | SSNS<br>N=7       |           | Reference <sup>a</sup><br>N=194 |           |                       | SSNS                   | Reference    |              |  |
| <b>2-3 years (P)</b>      |                   |           |                                 |           |                       | <i>P</i> <sup>c</sup>  |              |              |  |
| Age, mean (SD)            | 3.2 (0.4)         |           | 3.0 (0.6)                       |           |                       | 0.35                   |              |              |  |
| Male, n (%)               | 4 (57)            |           | 100 (51.5)                      |           |                       |                        |              |              |  |
| <b>SDQ subscales</b>      | <b>Mean</b>       | <b>SD</b> | <b>Mean</b>                     | <b>SD</b> | <i>P</i> <sup>c</sup> | <i>d</i> (95% CI)      | <b>n (%)</b> | <b>n (%)</b> |  |
| Emotional symptoms        | 2.9               | 2.3       | -                               | -         | -                     | -                      | -            | -            |  |
| Conduct problems          | 1.4               | 1.4       | -                               | -         | -                     | -                      | -            | -            |  |
| Hyperactivity-inattention | 3.4               | 3.4       | 3.7                             | 2.2       | 0.82                  | -0.13 (-0.89-0.62)     | 1 (14.3%)    | 21 (10.8)    |  |
| Peer problems             | 2.3               | 1.8       | -                               | -         | -                     | -                      | -            | -            |  |
| Prosocial behavior        | 6.4               | 2.1       | 7.6                             | 1.7       | 0.19                  | -0.70 (-1.46-0.06)     | 3 (42.9%)    | 16 (8.2)     |  |
| Total difficulties        | 10.0              | 6.1       | 7.8                             | 4.0       | 0.38                  | 0.54 (-0.21-1.29)      | 1 (14.3%)    | 20 (10.3)    |  |
| Internalizing problems    | 5.1               | 2.5       | -                               | -         | -                     | -                      | -            | -            |  |
| Externalizing problems    | 4.9               | 4.5       | 5.5                             | 3.0       | 0.71                  | -0.20 (-0.95-0.56)     | 1 (14.3%)    | 15 (7.7)     |  |
|                           | SSNS<br>N=11      |           | Reference <sup>a</sup><br>N=182 |           |                       |                        | SSNS         | Reference    |  |
| <b>4-5 years (P)</b>      |                   |           |                                 |           |                       | <i>P</i> <sup>c</sup>  |              |              |  |
| Age, mean (SD)            | 4.8 (0.6)         |           | 5.0 (0.6)                       |           |                       | 0.27                   |              |              |  |
| Male, n (%)               | 7 (64)            |           | 112 (61.5)                      |           |                       |                        |              |              |  |
| <b>SDQ subscales</b>      | <b>Mean</b>       | <b>SD</b> | <b>Mean</b>                     | <b>SD</b> | <i>P</i> <sup>c</sup> | <i>d</i> (95% CI)      | <b>n (%)</b> | <b>n (%)</b> |  |
| Emotional symptoms        | 1.5               | 1.5       | 1.3                             | 1.6       | 0.66                  | 0.13 (-0.48-0.73)      | 2 (18.2%)    | 15 (8.2)     |  |
| Conduct problems          | 0.9               | 0.7       | -                               | -         | -                     | -                      | -            | -            |  |
| Hyperactivity-inattention | 2.4               | 2.5       | 3.2                             | 2.5       | 0.30                  | -0.32 (-0.93-0.28)     | 1 (9.1%)     | 23 (12.6)    |  |
| Peer problems             | 1.0               | 1.4       | -                               | -         | -                     | -                      | -            | -            |  |
| Prosocial behavior        | 8.0               | 1.9       | 8.1                             | 1.9       | 0.91                  | -0.05 (-0.66-0.56)     | 2 (18.2%)    | 17 (9.3)     |  |
| Total difficulties        | 5.7               | 3.1       | 6.7                             | 4.8       | 0.32                  | -0.21 (-0.82-0.40)     | 0 (0%)       | 17 (9.3)     |  |
| Internalizing problems    | 2.5               | 2.2       | 2.2                             | 2.4       | 0.75                  | 0.13 (-0.48-0.73)      | 1 (9.1%)     | 14 (7.7)     |  |
| Externalizing problems    | 3.3               | 2.7       | 4.5                             | 3.3       | 0.17                  | -0.37 (-0.98-0.24)     | 1 (9.1%)     | 15 (8.2)     |  |
|                           | SSNS<br>N=17      |           | Reference <sup>a</sup><br>N=403 |           |                       |                        |              |              |  |
| <b>6-11 (P)</b>           |                   |           |                                 |           |                       | <i>P</i> <sup>c</sup>  |              |              |  |
| Age, mean (SD)            | 8.6 (1.9)         |           | 8.6 (1.7)                       |           |                       |                        |              |              |  |
| Male, n (%)               | 12 (71)           |           | 202 (50.1)                      |           |                       |                        |              |              |  |

| SDQ subscales             | Mean       | SD          | Mean                         | SD  | <i>P</i> <sup>c</sup> | <i>d</i> (95% CI)       | n (%)     | n (%)              |
|---------------------------|------------|-------------|------------------------------|-----|-----------------------|-------------------------|-----------|--------------------|
| Emotional symptoms        | 1.9        | 1.8         | 2.1                          | 2.2 | 0.65                  | -0.09 (-0.58-0.39)      | 2 (11.8%) | 30 (7.4)           |
| Conduct problems          | 0.9        | 0.7         | 1.2                          | 1.4 | 0.13                  | -0.22 (-0.70-0.27)      | 0 (0%)    | 29 (7.2)           |
| Hyperactivity-inattention | 2.7        | 2.1         | 3.6                          | 2.8 | 0.10                  | -0.32 (-0.81-0.16)      | 0 (0%)    | 48 (11.9)          |
| Peer problems             | 0.5        | 0.5         | 1.3                          | 1.8 | < <b>0.001</b>        | -0.45 (-0.94-0.03)      | 0 (0%)    | 47 (11.7)          |
| Prosocial behavior        | 9.2        | 1.0         | 8.3                          | 1.9 | <b>0.001</b>          | 0.48 (0.00-0.97)        | 0 (0%)    | 38 (9.4)           |
| Total difficulties        | 5.9        | 3.6         | 8.1                          | 6.2 | <b>0.022</b>          | -0.36 (-0.85-0.13)      | 0 (0%)    | 41 (10.2)          |
| Internalizing problems    | 2.4        | 2.4         | 3.4                          | 3.4 | 0.053                 | -0.30 (-0.78-0.19)      | 0 (0%)    | 34 (8.3)           |
| Externalizing problems    | 3.6        | 2.6         | 4.8                          | 3.7 | 0.08                  | -0.33 (-0.81-0.16)      | 0 (0%)    | 40 (9.9)           |
|                           |            | <b>SSNS</b> | <b>Reference<sup>b</sup></b> |     |                       |                         |           |                    |
|                           |            | <b>N=4</b>  | <b>N=736</b>                 |     |                       |                         |           |                    |
| <b>12-17 (P)</b>          |            |             |                              |     | <i>P</i> <sup>c</sup> |                         |           |                    |
| Age, mean (SD)            | 14.6 (0.7) |             | 14.3 (1.4)                   |     | 0.47                  |                         |           |                    |
| Male, n (%)               | 2 (50)     |             | 345 (46.9)                   |     |                       |                         |           |                    |
| SDQ subscales             | Mean       | SD          | Mean                         | SD  | <i>P</i> <sup>c</sup> | <i>d</i> (95% CI)       | n (%)     | n (%)              |
| Emotional symptoms        | 3.8        | 1.0         | 1.9                          | 2.1 | <b>0.031</b>          | <b>0.91 (0.10-1.71)</b> | 1 (25.0%) | 84 (11.4)          |
| Conduct problems          | 1.0        | 0.8         | 1.0                          | 1.4 | >0.99                 | 0.00 (-0.80-0.80)       | 0 (0%)    | 84 (11.4)          |
| Hyperactivity-inattention | 2.0        | 0.8         | 2.7                          | 2.5 | 0.18                  | -0.28 (-1.08-0.52)      | 0 (0%)    | 72 (9.8)           |
| Peer problems             | 1.3        | 1.9         | 1.5                          | 1.8 | 0.81                  | 10.11 (-0.91-0.70)      | 1 (25.0%) | 57 (7.7)           |
| Prosocial behavior        | 9.8        | 0.5         | 8.3                          | 1.8 | <b>0.010</b>          | <b>0.84 (0.03-1.64)</b> | 0 (0%)    | 116 (15.8)         |
| Total difficulties        | 8.0        | 3.4         | 7.0                          | 5.6 | 0.59                  | 0.17 (-0.62-0.98)       | 0 (0%)    | 76 (10.3)          |
| Internalizing problems    | 5.0        | 2.7         | 3.4                          | 3.3 | 0.32                  | 0.49 (-0.32-1.29)       | 1 (25.0%) | 80 (10.9)          |
| Externalizing problems    | 3.0        | 0.8         | 3.7                          | 3.3 | 0.18                  | -0.21 (-1.02-0.59)      | 0 (0%)    | 65 (8.8)           |
|                           |            | <b>SSNS</b> | <b>Reference<sup>b</sup></b> |     |                       |                         |           |                    |
|                           |            | <b>N=4</b>  | <b>N=993</b>                 |     |                       |                         |           |                    |
| <b>12-17 years (C)</b>    |            |             |                              |     | <i>P</i> <sup>c</sup> |                         |           |                    |
| Age, mean (SD)            | 13.7 (1.6) |             | 14.4 (1.5)                   |     |                       |                         |           |                    |
| Male, n (%)               | 3 (50)     |             | 466 (46.9)                   |     |                       |                         |           |                    |
| SDQ subscales             | Mean       | SD          | Mean                         | SD  | <i>P</i> <sup>c</sup> | <i>d</i> (95% CI)       | n (%)     | n (%) <sup>d</sup> |
| Emotional symptoms        | 2.5        | 1.1         | 2.3                          | 2.1 | 0.66                  | 0.10 (-0.89-1.07)       | 0 (0%)    | --                 |
| Conduct problems          | 0.8        | 1.0         | 1.3                          | 1.3 | 0.30                  | -0.38 (-1.37-0.60)      | 0 (0%)    | --                 |
| Hyperactivity-inattention | 3.5        | 1.1         | 3.7                          | 2.4 | 0.66                  | -0.08 (-1.07-0.90)      | 0 (0%)    | --                 |
| Peer problems             | 1.7        | 1.4         | 1.4                          | 1.6 | 0.65                  | 0.19 (-0.79-1.16)       | 1 (16.7%) | --                 |
| Prosocial behavior        | 9.3        | 0.5         | 8.1                          | 1.6 | <b>0.002</b>          | 0.75 (-0.23-1.73)       | 0 (0%)    | --                 |
| Total difficulties        | 8.5        | 3.1         | 8.6                          | 5.0 | 0.94                  | -0.02 (-1.00-0.96)      | 0 (0%)    | --                 |
| Internalizing problems    | 4.2        | 1.7         | 3.6                          | 3.1 | 0.46                  | 0.19 (-0.79-1.18)       | 0 (0%)    | --                 |
| Externalizing problems    | 4.3        | 1.8         | 5.0                          | 3.1 | 0.39                  | -0.23 (-1.21-0.76)      | 0 (0%)    | --                 |

<sup>a</sup> Reference data from Maurice-Stam et al. (2018).

<sup>b</sup> Reference data from Vugteveen et al. (2021).

<sup>c</sup> *P* values were calculated using a one-sample *t* test.

<sup>d</sup> Proportions of reference children aged 12-17 (self-report version) were not available (Vugteveen et al., 2021).

**Table S3** Results of the univariate regression analysis (after adjusting for multicollinearity) to identify clinical variables that are associated with the outcomes of **a.** the Pediatric Quality of Life Inventory 4.0 (PedsQL), both total HRQoL and subdomain scores, and **b.** the Strength and Difficulties Questionnaire (SDQ). Standardized regression coefficients ( $\beta$ ) and corresponding *P* values are shown. Clinical variables that had a significance level of  $< 0.05$  (shown in bold) were included in the final multiple regression analysis model. HRQoL = Health-related quality of life, NL/BE = born in the Netherlands or Belgium

| a. PedsQL                          | Total HRQoL |          | Physical functional |          | Emotional functioning |              | Social functioning |          | School functioning |          | Psychosocial functioning |          |
|------------------------------------|-------------|----------|---------------------|----------|-----------------------|--------------|--------------------|----------|--------------------|----------|--------------------------|----------|
|                                    | $\beta$     | <i>P</i> | $\beta$             | <i>P</i> | $\beta$               | <i>P</i>     | $\beta$            | <i>P</i> | $\beta$            | <i>P</i> | $\beta$                  | <i>P</i> |
| <b>Child characteristics</b>       |             |          |                     |          |                       |              |                    |          |                    |          |                          |          |
| Age (years)                        | -0.30       | 0.058    | -0.30               | 0.064    | -0.34                 | <b>0.034</b> | 0.08               | 0.64     | -0.31              | 0.053    | -0.28                    | 0.09     |
| Sex (male)                         | 0.09        | 0.57     | 0.11                | 0.51     | 0.20                  | 0.21         | -0.04              | 0.81     | -0.08              | 0.64     | 0.08                     | 0.61     |
| <b>Disease characteristics</b>     |             |          |                     |          |                       |              |                    |          |                    |          |                          |          |
| Time-to-remission (days)           | -0.17       | 0.30     | -0.15               | 0.35     | -0.32                 | <b>0.045</b> | 0.03               | 0.83     | 0.04               | 0.79     | -0.17                    | 0.31     |
| Illness (days)                     | -0.08       | 0.63     | -0.15               | 0.34     | -0.07                 | 0.67         | 0.08               | 0.62     | -0.01              | 0.96     | -0.02                    | 0.92     |
| School absence (days)              | -0.03       | 0.88     | -0.10               | 0.53     | -0.04                 | 0.79         | 0.17               | 0.29     | 0.00               | 0.98     | 0.03                     | 0.83     |
| Steroid side-effects present (yes) | -0.14       | 0.40     | -0.16               | 0.31     | -0.12                 | 0.47         | -0.11              | 0.49     | 0.02               | 0.88     | -0.10                    | 0.55     |
| <i>Moon face</i>                   | -0.11       | 0.49     | -0.13               | 0.43     | -0.07                 | 0.67         | -0.07              | 0.66     | -0.05              | 0.75     | -0.09                    | 0.58     |
| <i>Mood changes</i>                | 0.04        | 0.82     | 0.03                | 0.83     | -0.05                 | 0.75         | 0.16               | 0.33     | 0.07               | 0.68     | 0.04                     | 0.82     |
| <i>Behavioral problems</i>         | 0.07        | 0.65     | 0.15                | 0.34     | -0.08                 | 0.61         | 0.04               | 0.83     | 0.13               | 0.44     | 0.00                     | 0.99     |
| <i>Weight gain</i>                 | 0.05        | 0.78     | 0.13                | 0.43     | 0.02                  | 0.92         | -0.11              | 0.49     | -0.01              | 0.96     | -0.02                    | 0.91     |
| <i>Binge eating</i>                | -0.14       | 0.38     | -0.17               | 0.30     | -0.04                 | 0.79         | -0.02              | 0.92     | -0.16              | 0.32     | -0.11                    | 0.51     |
| Medication used (n)                | -0.12       | 0.47     | -0.16               | 0.33     | 0.07                  | 0.69         | 0.06               | 0.69     | -0.30              | 0.064    | -0.08                    | 0.63     |
| <b>Sociodemographics parents</b>   |             |          |                     |          |                       |              |                    |          |                    |          |                          |          |
| Country of birth (NL/BE)           | 0.09        | 0.60     | 0.13                | 0.44     | 0.06                  | 0.73         | -0.14              | 0.39     | 0.16               | 0.33     | 0.05                     | 0.77     |
| Educational level (high)           | 0.21        | 0.58     | 0.11                | 0.76     | 0.26                  | 0.48         | 0.03               | 0.94     | 0.24               | 0.52     | 0.25                     | 0.51     |

| b. SDQ                             | Emotional symptoms |              | Conduct problems |          | Hyperactivity-Inattention |              | Peer problems |              | Prosocial behavior |              | Total difficulties |          | Internalizing problems |          | Externalizing problems |              |
|------------------------------------|--------------------|--------------|------------------|----------|---------------------------|--------------|---------------|--------------|--------------------|--------------|--------------------|----------|------------------------|----------|------------------------|--------------|
|                                    | $\beta$            | <i>P</i>     | $\beta$          | <i>P</i> | $\beta$                   | <i>P</i>     | $\beta$       | <i>P</i>     | $\beta$            | <i>P</i>     | $\beta$            | <i>P</i> | $\beta$                | <i>P</i> | $\beta$                | <i>P</i>     |
| <b>Child characteristics</b>       |                    |              |                  |          |                           |              |               |              |                    |              |                    |          |                        |          |                        |              |
| Age (years)                        | 0.19               | 0.25         | -0.09            | 0.59     | -0.10                     | 0.56         | -0.24         | 0.14         | 0.51               | <.001        | -0.07              | 0.67     | 0.01                   | 0.97     | -0.11                  | 0.52         |
| Sex (male)                         | -0.01              | 0.97         | 0.27             | 0.10     | -0.05                     | 0.78         | 0.33          | <b>0.039</b> | -0.19              | 0.25         | 0.14               | 0.41     | 0.18                   | 0.28     | 0.04                   | 0.79         |
| <b>Disease characteristics</b>     |                    |              |                  |          |                           |              |               |              |                    |              |                    |          |                        |          |                        |              |
| Time to remission (days)           | 0.06               | 0.72         | 0.10             | 0.53     | 0.08                      | 0.64         | -0.16         | 0.33         | 0.06               | 0.73         | 0.04               | 0.81     | -0.05                  | 0.78     | 0.09                   | 0.57         |
| Illness (days)                     | 0.00               | 0.98         | -0.11            | 0.52     | -0.01                     | 0.94         | -0.14         | 0.40         | 0.15               | 0.36         | -0.08              | 0.64     | -0.08                  | 0.63     | -0.04                  | 0.80         |
| School absence (days)              | 0.00               | 0.99         | -0.27            | 0.09     | -0.08                     | 0.64         | -0.20         | 0.23         | 0.38               | <b>0.016</b> | -0.16              | 0.32     | -0.11                  | 0.50     | -0.14                  | 0.38         |
| Steroid side-effects present (yes) | -0.13              | 0.44         | 0.18             | 0.28     | 0.15                      | 0.37         | 0.01          | 0.96         | -0.06              | 0.71         | 0.07               | 0.68     | -0.09                  | 0.59     | 0.17                   | 0.29         |
| <i>Moon face</i>                   | 0.03               | 0.84         | 0.03             | 0.87     | 0.06                      | 0.70         | -0.10         | 0.55         | -0.03              | 0.86         | 0.02               | 0.88     | -0.03                  | 0.86     | 0.06                   | 0.72         |
| <i>Mood changes</i>                | -0.04              | 0.82         | 0.03             | 0.85     | 0.19                      | 0.26         | -0.02         | 0.92         | -0.18              | 0.26         | 0.09               | 0.59     | -0.04                  | 0.82     | 0.16                   | 0.32         |
| <i>Behavioral problems</i>         | -0.06              | 0.72         | 0.28             | 0.08     | 0.35                      | <b>0.028</b> | -0.13         | 0.42         | 0.04               | 0.80         | 0.19               | 0.25     | -0.12                  | 0.48     | 0.37                   | <b>0.020</b> |
| <i>Weight gain</i>                 | -0.20              | 0.22         | -0.02            | 0.90     | 0.08                      | 0.63         | -0.01         | 0.94         | -0.03              | 0.86         | -0.05              | 0.75     | -0.16                  | 0.34     | 0.06                   | 0.72         |
| <i>Binge eating</i>                | -0.33              | <b>0.039</b> | 0.02             | 0.89     | 0.14                      | 0.41         | 0.05          | 0.74         | -0.04              | 0.82         | -0.05              | 0.78     | -0.22                  | 0.19     | 0.12                   | 0.47         |
| Medication used (n)                | 0.07               | 0.66         | 0.15             | 0.35     | 0.14                      | 0.41         | 0.12          | 0.48         | -0.11              | 0.52         | 0.18               | 0.28     | 0.12                   | 0.47     | 0.16                   | 0.34         |
| <b>Sociodemographics parents</b>   |                    |              |                  |          |                           |              |               |              |                    |              |                    |          |                        |          |                        |              |
| Country of birth (NL/BE)           | -0.04              | 0.80         | 0.01             | 0.93     | 0.19                      | 0.26         | 0.16          | 0.34         | -0.16              | 0.35         | 0.14               | 0.39     | 0.06                   | 0.73     | 0.16                   | 0.34         |
| Educational level (high)           | -0.38              | 0.10         | 0.00             | >0.99    | 0.05                      | 0.84         | 0.06          | 0.81         | -0.19              | 0.38         | -0.12              | 0.62     | -0.25                  | 0.27     | 0.04                   | 0.87         |
